# Supplementary material for: Characterization of SARS-CoV-2 genetic evolution in vaccinated and non-vaccinated patients from the Kenyan population
Source: Research Square preprint supplement (doi:10.21203/rs.3.rs-3457875/v1), 2023-10-27
Supplement: Supplementary file 1 [file 65579ca1897917476ed92846.docx]

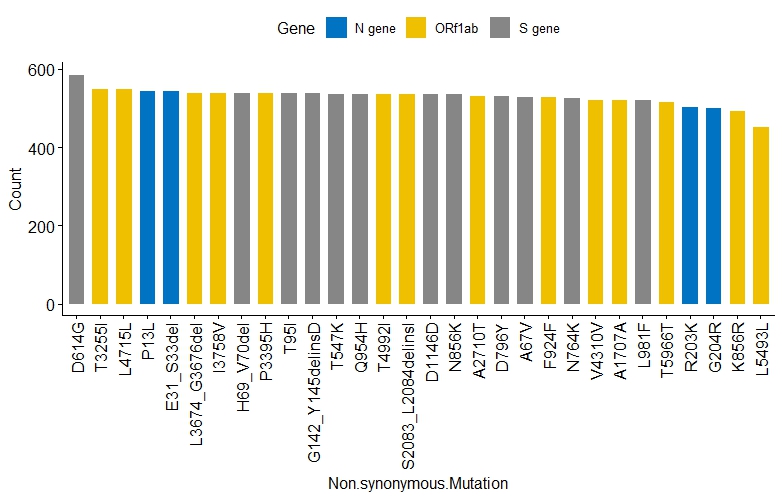


**Supplementary Fig. 1: Top 30 mutations in non-vaccinated and vaccinated patients in Kenya.**

**Mutations**

**Counts**

Supplementary Fig. 1: Shows the top 30 mutations in non-vaccinated and vaccinated patients in Kenya. Mutations were mostly found on the ORF1a/b, S, and N gene. Mutations in blue are found in the N genes, those in yellow are found in the ORF 1a/b, and those in grey are found in the S gene.

**Supplementary Fig. 2: Recombination events per patient in non-vaccinated and vaccinated patients in Kenya.**

***Deletion***

***Duplication***

***Insertions***


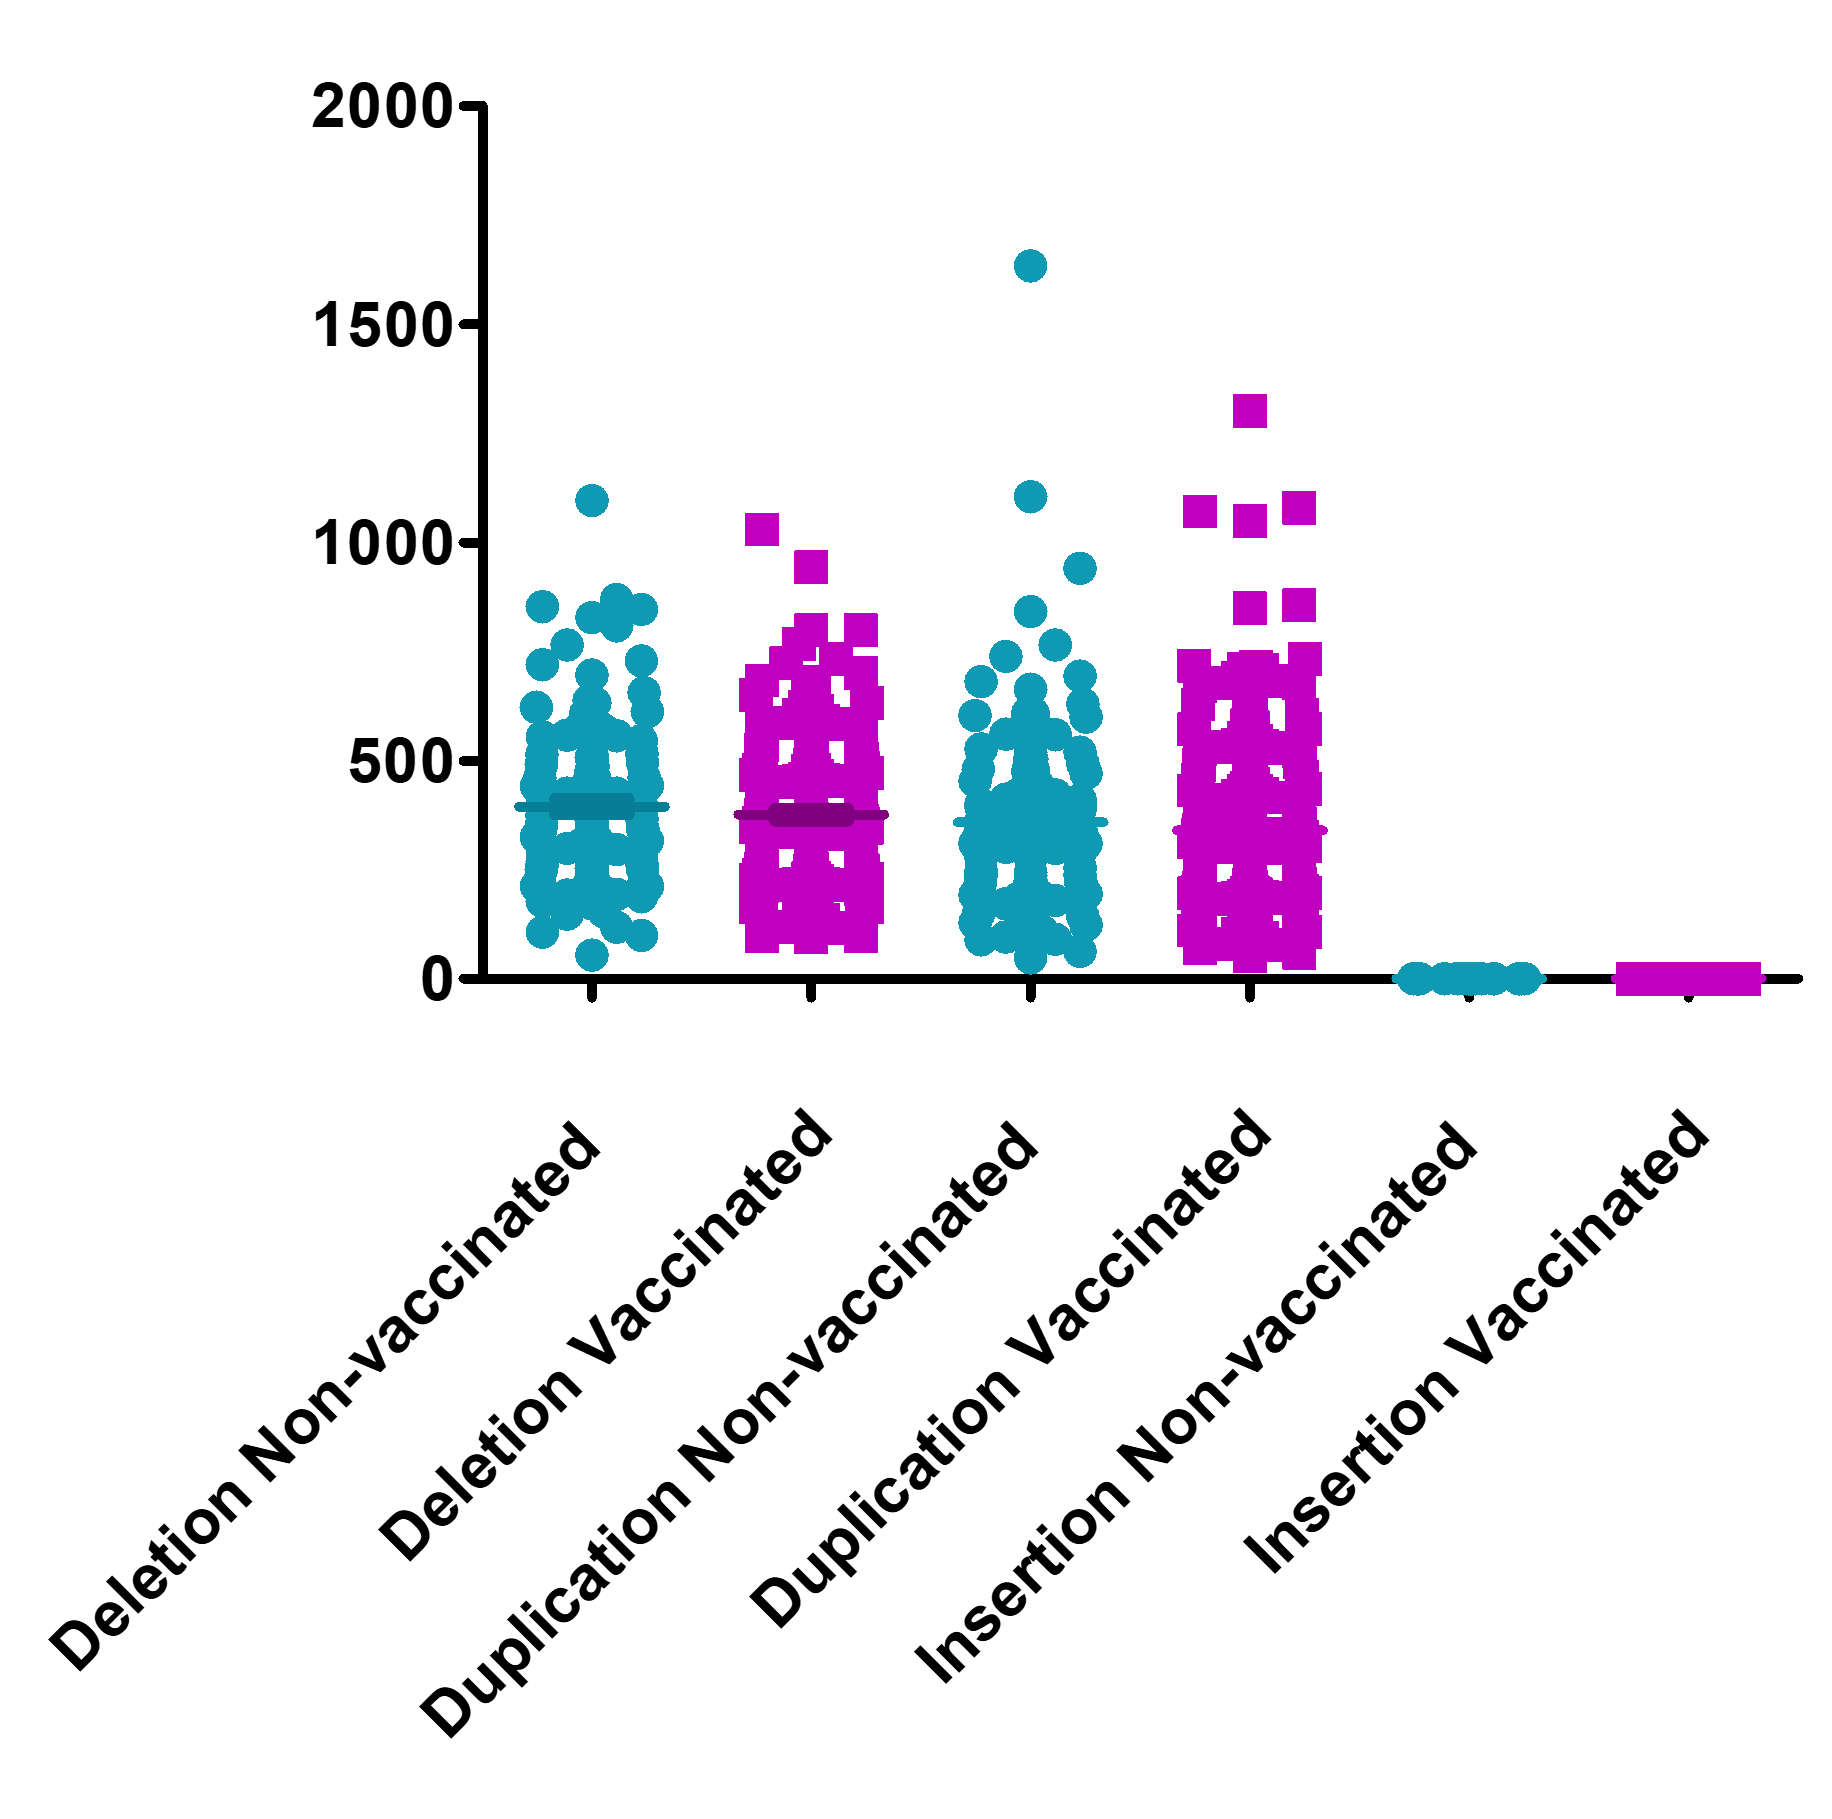


**Non-vaccinated**

**Vaccinated**

**Patient samples**

**Recombination events**

Supplementary Fig. 2: Shows the number of deletion, duplications, and insertion events per patient in non-vaccinated and vaccinated patients in Kenya. Green circles represent recombination events found in non-vaccinated patients and purple boxes represent those found in vaccinated patients.


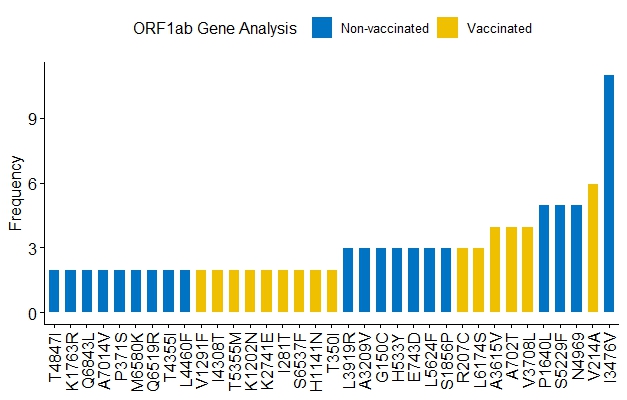


**A.**

**Supplementary Fig. 3: Unique mutations in the ORF 1a/b, N, and S gene of non-vaccinated and vaccinated patients in Kenya.**


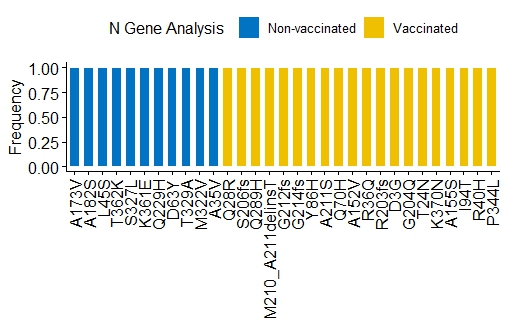

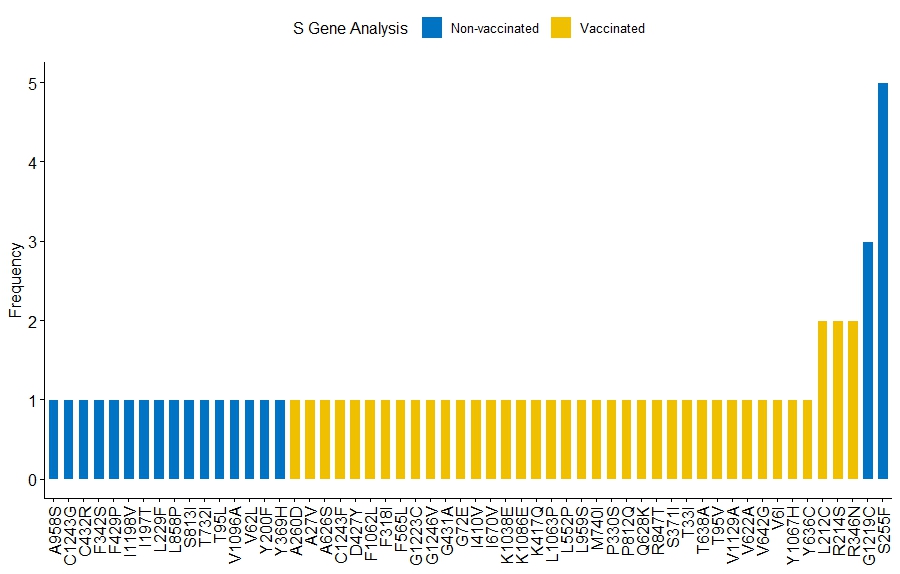


**B.**

**C.**

Supplementary Fig. 3: Unique mutations in non-vaccinated and vaccinated patients in Kenya. Mutations in blue represent those found in non-vaccinated patients and those in yellow represent those in vaccinated patients. A. Shows unique mutations in the ORF1 a/b. B. Shows unique mutations in the S genes C. Shows unique mutations in the N gene.
